# Supplementary material for: Galdieria sulphuraria: An Extremophilic Alga as a Source of Antiviral Bioactive Compounds
Source: MDPI journal article supplement (doi:10.3390/md21070383), 2023-06-28
Supplement: s1 [file s1]

Article

# *Galdieria sulphuraria*: an extremophilic algae as source of antiviral bioactive compounds

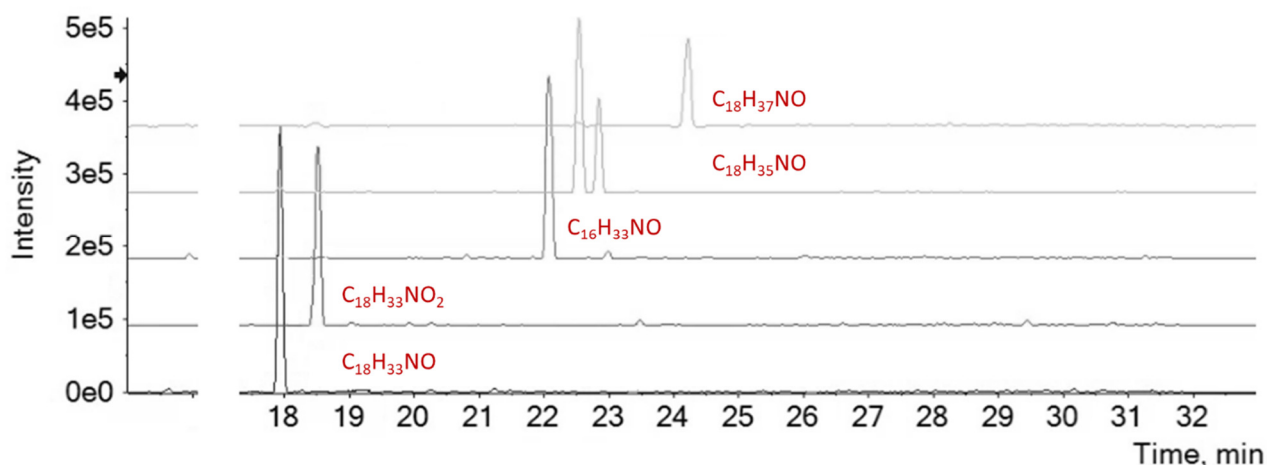

**Figure S1.** Extracted ion chromatograms (XICs) of detected and tentatively identified fatty acid amides.

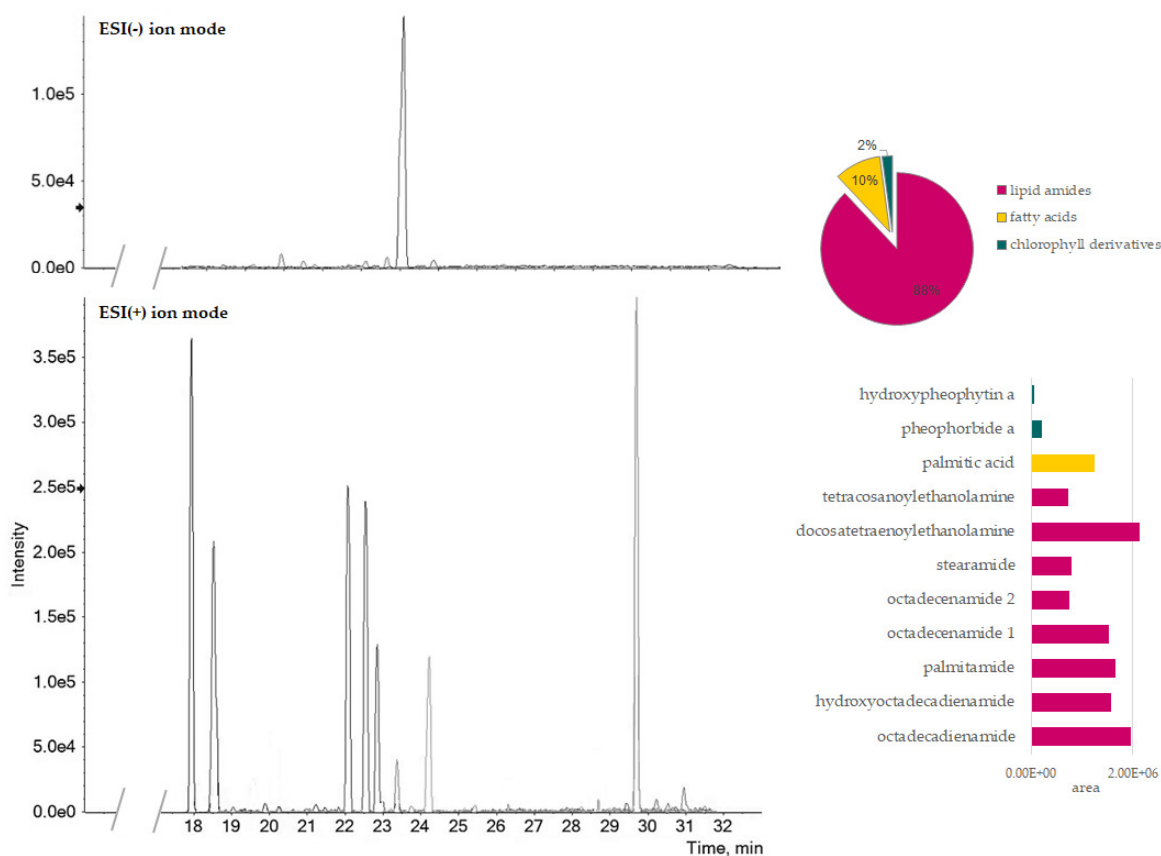

**Figure S2.** TICs (Total Ion Chromatograms) acquired in ESI(-) ion mode (upper panel) and ESI(+) ion mode (lower panel). Relative quantitation data are also reported.

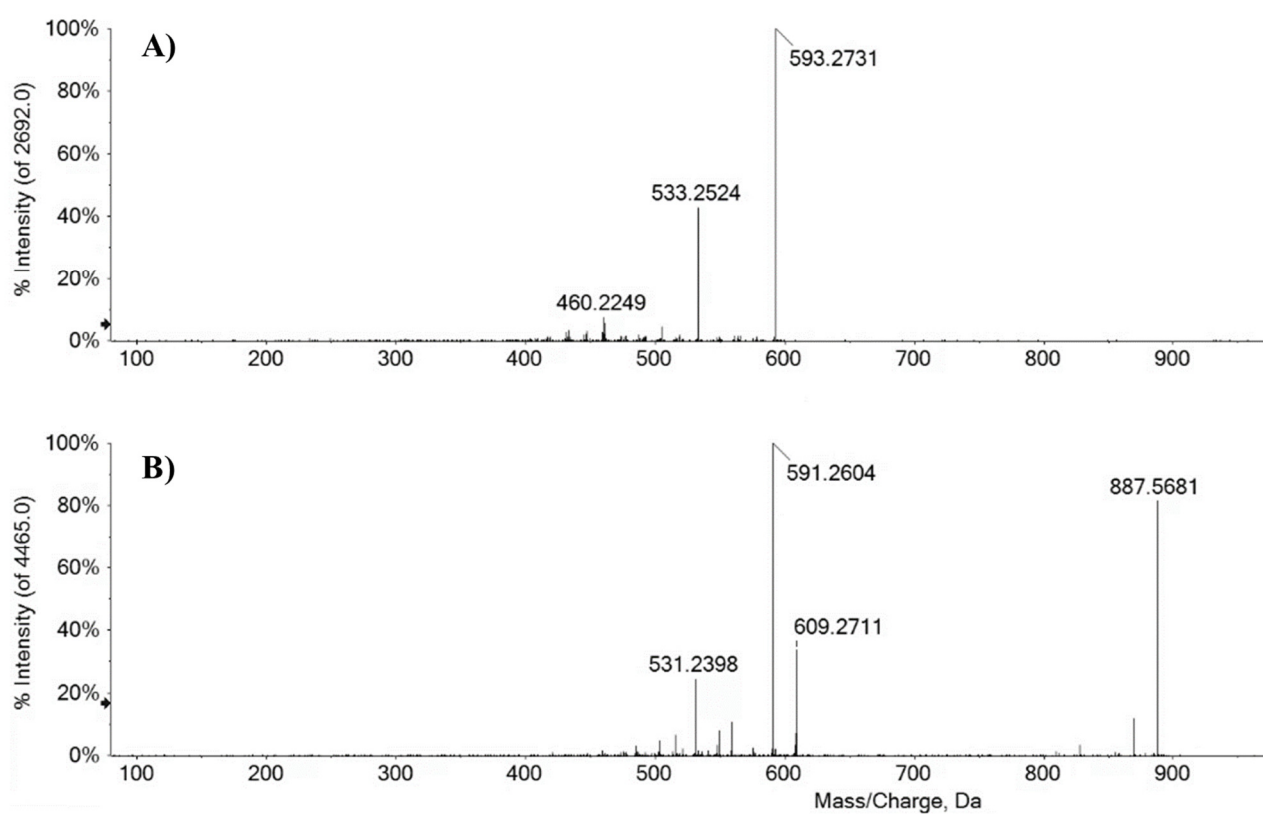

**Figure S3.** TOF-MS/MS spectrum of (A) pheophorbide a and (B) hydroxypheophytin a.
